# Supplementary material
Source: Springer Nature journal article supplement (https://www.springermedizin.de/resource/supplementary/12245_2011_40_MOESM1_ESM.pdf/9672650)

# Age Group

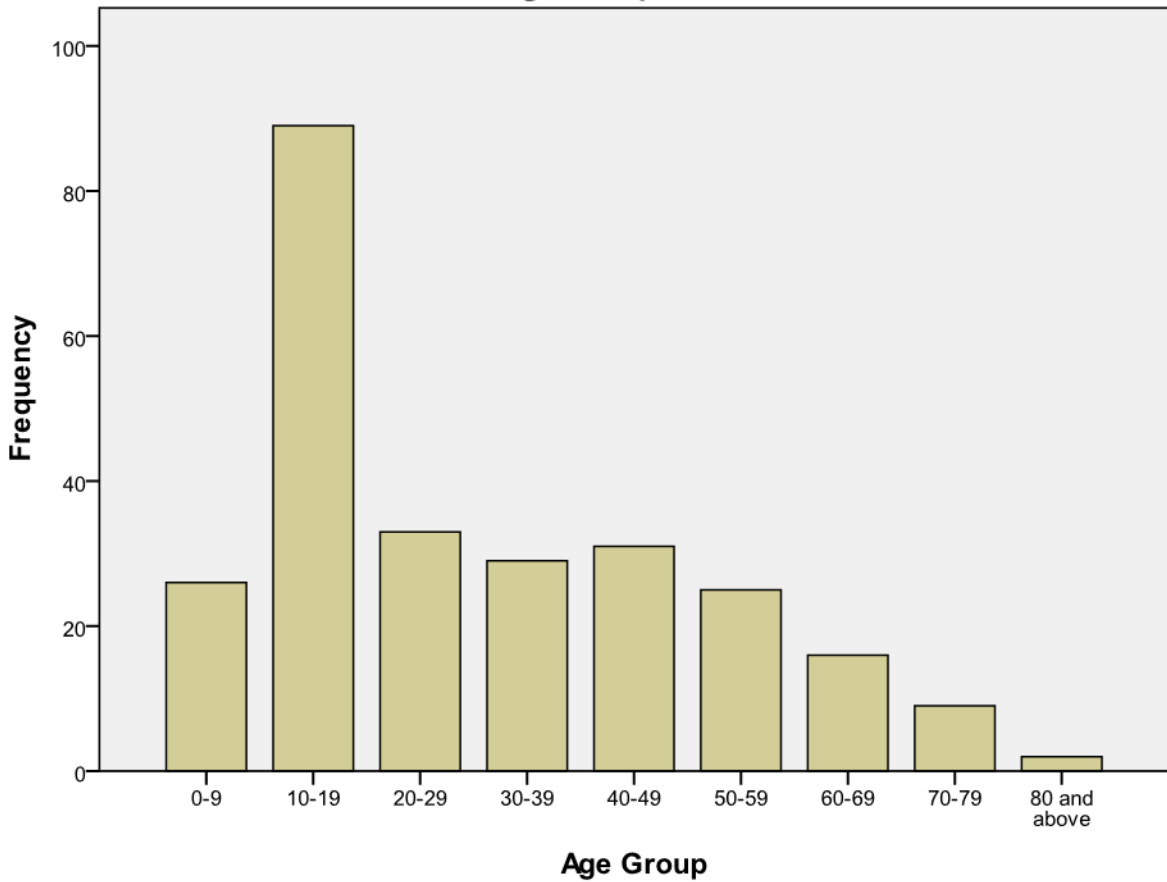

Supplement: MOESM1 [file 9672650]
